# Supplementary material for: Remote Symptom Monitoring Using Patient-Reported Outcomes in Patients With Chronic Kidney Disease: Process Evaluation of a Randomized Controlled Trial
Source: PubMed Central journal article supplement (PMC11079764; doi:10.2196/48173), 2024-04-24
Supplement: formative_v8i1e48173_app4.pdf [file formative_v8i1e48173_app4.pdf]

**Characteristics of patients adhering to PRO-based follow-up according to demographic, disease-related and individual determinants divided to high ( $\geq 83\%$ ) and low ( $< 83\%$ ) adherence. N = 93**

|                                                                               | Low adherence,<br>N = 23<br>n (%) | High adherence,<br>N = 70<br>n (%) | P value<br>X <sup>2</sup> test |
|-------------------------------------------------------------------------------|-----------------------------------|------------------------------------|--------------------------------|
| <b>Age, years</b>                                                             |                                   |                                    | 0.18                           |
| ≤ 69                                                                          | 7 (30)                            | 23 (33)                            |                                |
| 70-79                                                                         | 8 (35)                            | 35 (50)                            |                                |
| ≥ 80                                                                          | 8 (35)                            | 12 (17)                            |                                |
| <b>Gender</b>                                                                 |                                   |                                    | 0.86                           |
| Male                                                                          | 14 (61)                           | 44 (63)                            |                                |
| <b>Education</b>                                                              |                                   |                                    | 0.48                           |
| High (> 12 years)                                                             | 6 (26)                            | 12 (17)                            |                                |
| Medium (10-12 years)                                                          | 10 (44)                           | 34 (49)                            |                                |
| Low (< 10 years)                                                              | 4 (17)                            | 19 (27)                            |                                |
| Missing                                                                       | 3 (13)                            |                                    |                                |
| <b>Labour market affiliation</b>                                              |                                   |                                    | 0.79                           |
| Employed                                                                      | 3 (13)                            | 8 (11)                             |                                |
| Non employed                                                                  | 18 (78)                           | 58 (83)                            |                                |
| Missing                                                                       | 2 (9)                             | 4 (6)                              |                                |
| <b>Renal function</b>                                                         |                                   |                                    | 0.53                           |
| CKD 3b                                                                        | 10 (43)                           | 31 (44)                            |                                |
| CKD 4/5                                                                       | 13 (57)                           | 39 (56)                            |                                |
| <b>Comorbidity (Charlson Index)</b>                                           |                                   |                                    | 0.17                           |
| Low 0                                                                         | -                                 | 5 (7)                              |                                |
| Medium 1-2                                                                    | 18 (78)                           | 42 (60)                            |                                |
| High > 2                                                                      | 5 (22)                            | 23 (33)                            |                                |
| <b>General health</b>                                                         |                                   |                                    | 0.14                           |
| Excellent/very good                                                           | 2 (9)                             | 19 (27)                            |                                |
| Good                                                                          | 12 (52)                           | 27 (39)                            |                                |
| Fair/poor health                                                              | 9 (39)                            | 24 (34)                            |                                |
| <b>Self-efficacy (GSE)</b>                                                    |                                   |                                    | 0.58                           |
| Mean (SD)                                                                     | 30.1 (5.11)                       | 30.3 (5.0)                         |                                |
| Median [IQR]                                                                  | 31 [8]                            | 30 [7]                             |                                |
| <b>HLQ 4: Social support for health</b>                                       |                                   |                                    | 0.73                           |
| Mean (SD)                                                                     | 3.19 (0.65)                       | 3.22 (0.46)                        |                                |
| Median [IQR]                                                                  | 3.3 [0.8]                         | 3.2 [0.6]                          |                                |
| Missing                                                                       | 2 (9)                             | 4 (6)                              |                                |
| <b>HLQ 6: Ability to actively engage with healthcare providers</b>            |                                   |                                    | 0.50                           |
| Mean (SD)                                                                     | 4.05 (0.64)                       | 3.92 (0.70)                        |                                |
| Median [IQR]                                                                  | 4 [0.8]                           | 4 [0.8]                            |                                |
| Missing                                                                       | 2 (9)                             | 4 (6)                              |                                |
| <b>HLQ 9: Understanding health information well enough to know what to do</b> |                                   |                                    | 0.65                           |
| Mean (SD)                                                                     | 3.95 (0.59)                       | 3.93 (0.58)                        |                                |
| Median [IQR]                                                                  | 3.8 [0.8]                         | 4 [0.6]                            |                                |
| Missing                                                                       | 2 (9)                             | 4 (6)                              |                                |
| <b>Patient activation<sup>a)</sup></b>                                        |                                   |                                    | 0.21                           |
| Agree/strongly agree                                                          | 19 (82)                           | 64 (77)                            |                                |
| Disagree/strongly disagree                                                    | 2 (9)                             | 2 (50)                             |                                |
| Missing                                                                       | 2 (9)                             |                                    |                                |
| <b>Patient activation<sup>b)</sup></b>                                        |                                   |                                    | 0.21                           |
| Agree/strongly agree                                                          | 17 (74)                           | 60 (86)                            |                                |
| Disagree/strongly disagree                                                    | 4 (17)                            | 6 (8)                              |                                |
| Missing                                                                       | 2 (9)                             | 4 (6)                              |                                |

CKD: Chronic Kidney Disease; HLQ: Health Literacy Questionnaire; GSE: General Self-efficacy scale;

<sup>a)</sup> Taking an active role in my own health care is the most important thing that affects my health

<sup>b)</sup> I am confident I can figure out solutions when new situations or problems arise with my health condition
